# Supplementary material
Source: publisher figshare collection journal article supplement (https://acs.figshare.com/ndownloader/files/3622695)
Supplement: Supplementary file 1 [file 3622695]

Supplemental Material for

## **Measurement and Modeling of Carbon Monoxide Emission Rates from Multiple Wood Pellet Types**

Lydia Soto-Garcia<sup>1,2</sup>, Xinrui Huang,<sup>1</sup> Devraj Thimmaiah<sup>1,2</sup>, Zach Denton,<sup>2</sup> Alan Rossner,<sup>2</sup> and Philip Hopke<sup>1,2</sup>

1Center for Air Resources Engineering and Science, Clarkson University, Potsdam, NY 13699 USA

2Institute for the Sustainable Environment, Clarkson University, Potsdam, NY 13699 USA

### Nomenclature

$[\text{CO}]$  is the gaseous mixing fraction of carbon monoxide

$V_g$  is the total volume of the gas phase inside the drum.

$k_{\text{CO}}$  = the rate constant of CO off-gassing

$k_{\text{OD}}$  = the rate constant for any other  $\text{O}_2$  depletion reactions

$m_p$  = the total mass of stored pellets

$w_{R-\text{CO}}$  is the unit amount of reactant (generating CO) on the pellet surface.

$w_{R-\text{CO},T}$  is the total potential amount of CO-generating reactant on the pellet surface.

Table S1. Units of parameters or variables in the improved model develop

| Parameter / variable                           | Dimension                                             |
|------------------------------------------------|-------------------------------------------------------|
| $[\text{CO}], [\text{O}_2]$                    | $\frac{\text{mol}}{\text{m}^3}$                       |
| $w_{R-\text{CO}} \quad w_{\text{R}-\text{CO}}$ | $\frac{\text{mol Reactant}}{\text{kg pellets}}$       |
| $k_{\text{CO}}$                                | $\frac{\sqrt{\text{m}^3 / \text{mol}}}{\text{s}}$     |
| $k_{\text{OD}}$                                | $\frac{\text{m}^3}{\text{kg} \cdot \text{s}}$         |
| $r_{\text{CO}}, r_{\text{OD}}, r_{\text{O}_2}$ | $\frac{\text{mol}}{\text{kg pellets} \cdot \text{s}}$ |

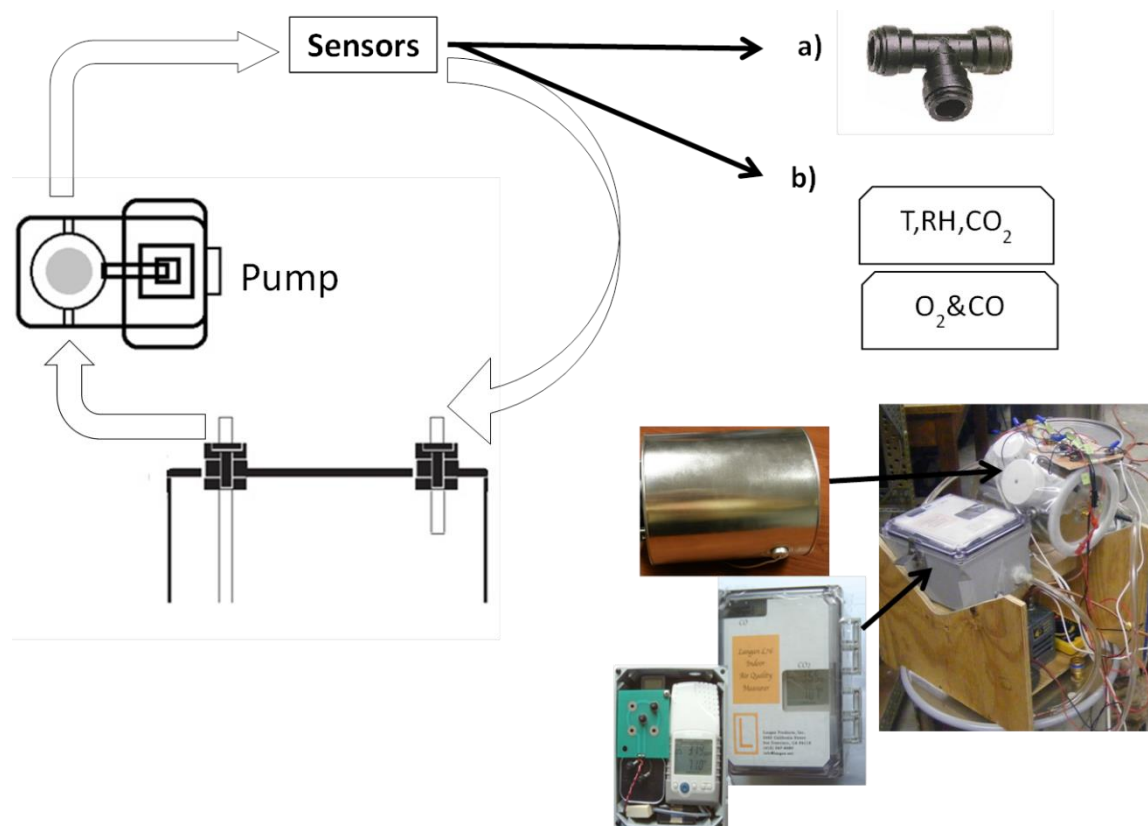

**Figure S1.** Recirculation system to get air samples used for the off-gassing experiments: **a)** first set of experiment using a T shape fit to the  $\text{CO}$ ,  $\text{O}_2$ , and RH sensors; and **b)** second set up were the air loop pass through 2 boxes with  $\text{CO}$ ,  $\text{O}_2$ ,  $\text{CO}_2$ , T and RH sensors.

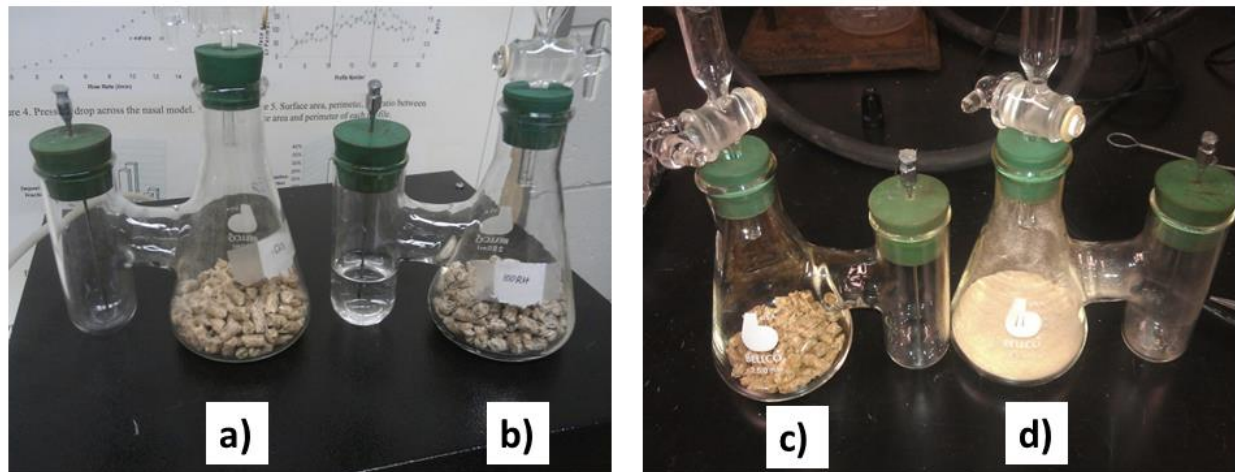

**Figure S2.** Photographs for the testing of Moisture Content and Surface Area effect in pellets by using Erlenmeyer flasks as storing chambers. Flask (a) loaded with dried pellets; Flask (b) contains liquid water; Flask (c) loaded with regular pellets; Flask (d) loaded with ground pellets.

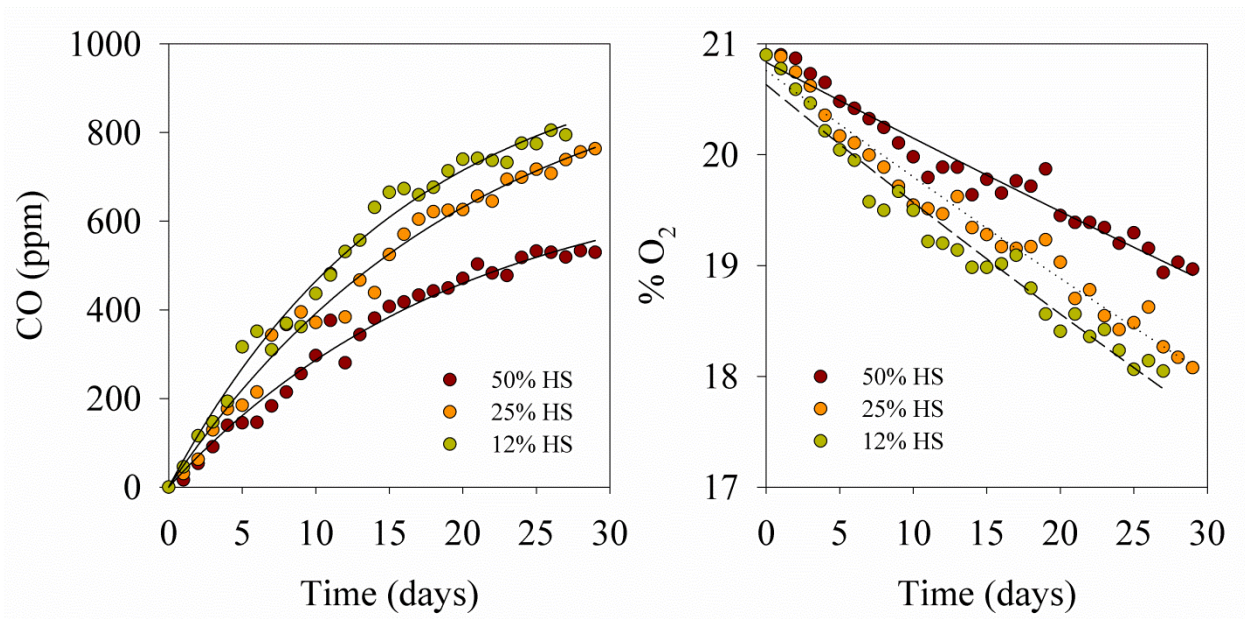

Figure S3. CO concentration and % O<sub>2</sub> as a function of time for 50%, 25% and 12% HS.

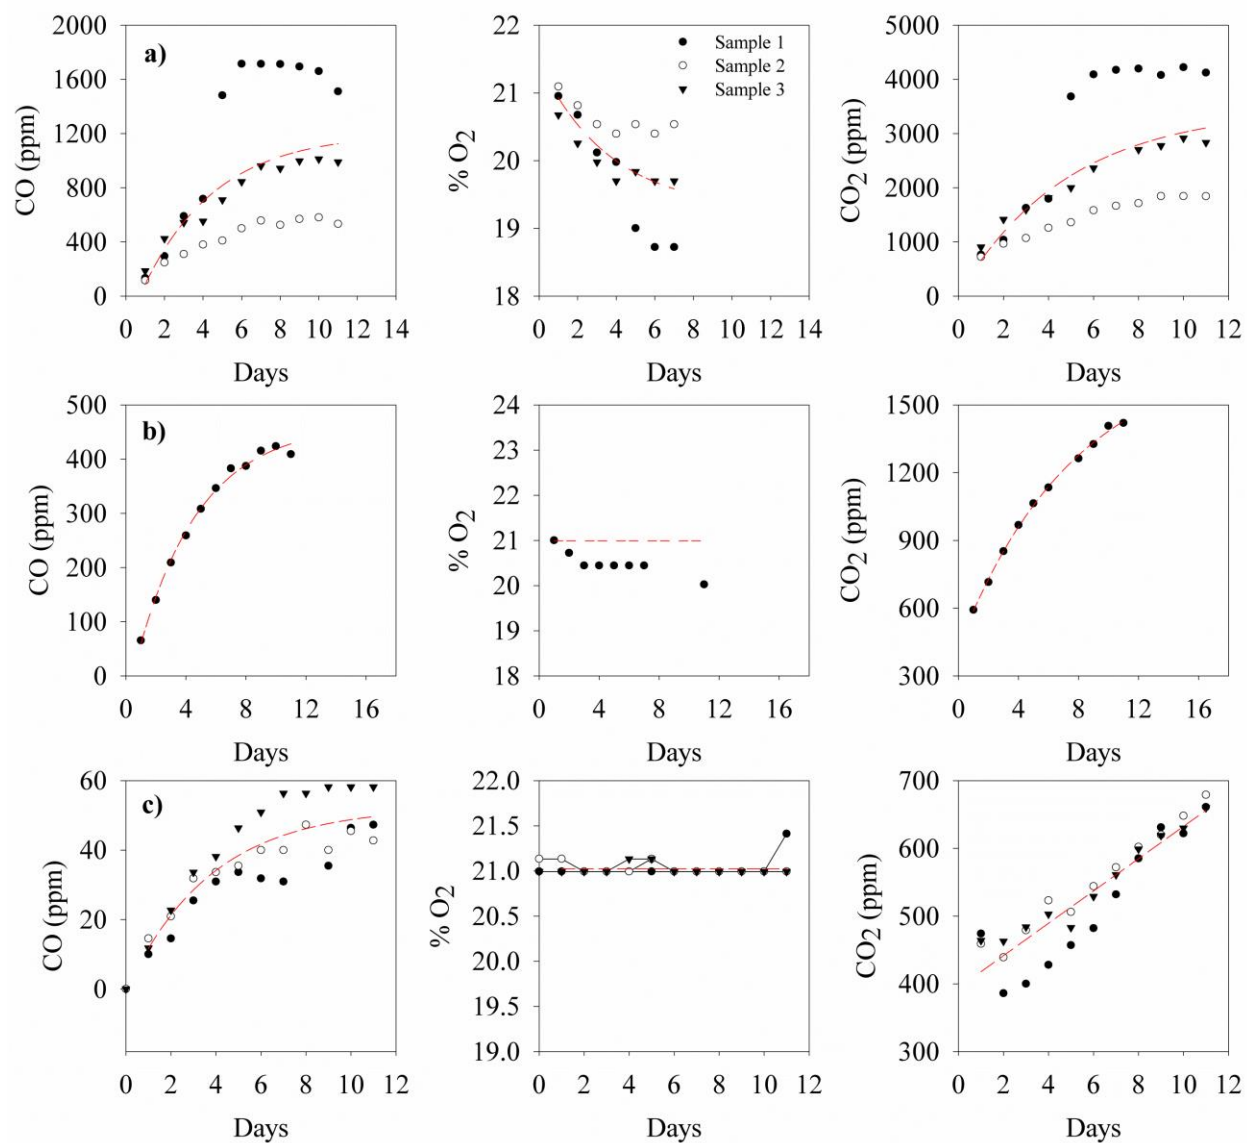

**Figure S4.** CO, O<sub>2</sub>, CO<sub>2</sub> concentrations as a function of time for aged pellets (one month old) under three different temperatures conditions: a) 30, b) 22, and c) 6-8°C..
